# Supplementary material for: Healthcare Professionals' perspectives on prescribing DOACs to frail older patients; The DOAC-FRAIL questionnaire
Source: Research Square preprint supplement (doi:10.21203/rs.3.rs-7542541/v1), 2025-10-13
Supplement: Supplementary file 1 [file 9024608f153bddeebd21ce26.docx]

SUPPLEMENTARY MATERIAL

**DOAC-FRAIL Survey**

**Introduction**

Dear colleague,

We would like to invite you to participate in a survey regarding the use of DOACs in the frail older population. Over the past years, DOACs have replaced VKAs as the first-line treatment for, among others, atrial fibrillation, pulmonary embolism, and deep vein thrombosis. Considering our aging population and the high prevalence of these conditions among older adults, the use of DOACs in frail older patients is expected to increase significantly in the coming years.

This survey is distributed among geriatric internists (in training), cardiologists (in training), geriatricians (in training), and general practitioners (in training) in the Netherlands and Belgium—all healthcare professionals frequently involved in the treatment of frail older patients. Through this survey, we aim to gain insight into prescribing practices regarding DOACs in the frail older population, and to identify relevant needs, concerns, and prescribing barriers among healthcare professionals.

Completing the survey will take approximately 10 minutes. It consists of 16 statements, 6 multiple-choice questions, and 3 clinical cases. At several points, you will be able to share your considerations, comments, or questions.

We intend to publish the results in a scientific journal. Furthermore, we will actively share the outcomes with you through your professional association.

Thank you very much for your collaboration.

**General Questions**

1. **What is your specialization?**
   - Geriatric internist / clinical geriatrician
   - Geriatric internist / clinical geriatrician (in training)
   - Cardiologist
   - Cardiologist (in training)
   - Geriatrician
   - Geriatrician (in training)
   - General practitioner
   - General practitioner (in training)
   - Nurse practitioner / physician assistant
   - Nurse practitioner / physician assistant (in training)
2. **In which type of healthcare institution are you employed?**
   - Academic hospital
   - Peripheral hospital
   - Nursing home
   - General practice
   - Other: …
3. **In which country do you work?**
   - The Netherlands
   - Belgium
4. **To which age group do you belong?**
   - 25–29 years
   - 30–34 years
   - 35–39 years
   - 40–44 years
   - 45–49 years
   - 50–54 years
   - 55–59 years
   - 60–64 years
   - 65–70 years
5. **How many years of work experience do you have?**
   - 0–5 years
   - 5–10 years
   - 10–15 years
   - 15 years

**Statements**

Please rate the following statements on the scale:
1 = never, 2 = rarely, 3 = neutral, 4 = often, 5 = always

1. I regularly prescribe a DOAC to frail older patients and/or frequently treat frail older patients using a DOAC.
2. When choosing between a DOAC or a VKA, the degree of frailty is a factor I consider.
3. When choosing between a DOAC or a VKA, chronological age itself is a factor I consider.
4. When choosing between a DOAC or a VKA, cognitive functioning is a factor I consider.
5. When choosing between a DOAC or a VKA, fall risk is a factor I consider.
6. I actively switch frail older patients from a VKA to a DOAC.
7. When indicated, I make use of the option to measure DOAC plasma levels.
8. I adjust the DOAC dosage based on plasma level measurement.
9. When a frail older patient presents to the Emergency Department or is admitted acutely, I request a DOAC plasma level.
10. I am confident that frail older patients using a DOAC will have an appropriate plasma level, despite the absence of routine monitoring.
11. In frail older patients, I prescribe a reduced DOAC dose regardless of renal function and/or body weight.

Please rate the following statements on the scale:
1 = strongly disagree, 2 = disagree, 3 = neutral, 4 = agree, 5 = strongly agree

1. I believe DOACs are beneficial for frail older patients, as they eliminate the need for monitoring and variable dosing.
2. There is insufficient evidence to safely prescribe DOACs in the frail older population.
3. Clear recommendations regarding DOAC prescription in frail older patients are needed.
4. At each visit, I check whether the dose is still appropriate given the patient’s weight and/or renal function, and adjust if necessary.
5. When prescribing a DOAC, I ensure that adequate annual follow-up of adherence, complications, and renal function is performed (the so-called “weight consultation”).

**Multiple-Choice Questions**

1. **When prescribing a DOAC for a frail older patient, my preference is for:**
   - Apixaban
   - Rivaroxaban
   - Edoxaban
   - Dabigatran
   - No preference

*Open question 1: Why?*

2a. **When I need to prescribe anticoagulation for a frail older patient (e.g., Clinical Frailty Scale >5), my preference is for:**

- A DOAC
- A VKA
- LMWH

2b. **My main reasons for this choice are:**

- Efficacy
- Side-effect profile
- Adherence
- Need for monitoring or not
- Other: …

1. **For very old patients (>80 years), my preference is for:**
   - A DOAC
   - A VKA
   - LMWH

4a. **For patients with cognitive impairment, my preference is for:**

- A DOAC
- A VKA
- LMWH

4b. **My main reasons for this choice are:**

- Efficacy
- Side-effect profile
- Adherence
- Need for monitoring or not
- Other: …

1. **My experience is that frail older patients have fewer complications in the form of bleeding with:**
   - A DOAC
   - A VKA
2. **My reasons for requesting DOAC plasma level measurement are:**
   - Bleeding under DOAC use
   - Routine measurement
   - Thrombosis under DOAC use
   - Other: …

**Additional Comments**

Thank you for your collaboration.
